# Supplementary material for: Intensity correlation scan (IC-scan) technique to characterize the optical nonlinearities of scattering media
Source: PubMed Central journal article supplement (PMC10160117; doi:10.1038/s41598-023-34486-0), 2023-05-04
Supplement: 41598_2023_34486_MOESM1_ESM.pdf [file 41598_2023_34486_MOESM1_ESM.pdf]

# SUPPLEMENTARY MATERIAL

## Intensity correlation scan (IC-scan) technique to characterize the optical nonlinearities of scattering media

Mariana J. B. Crispim<sup>1</sup>, Cícera C. S. Pereira<sup>1</sup>, Nathália T. C. Oliveira<sup>2</sup>, Martine Chevrollier<sup>1</sup>, Rafael A. de Oliveira<sup>1</sup>, Weliton S. Martins<sup>1</sup>, and Albert S. Reyna<sup>1,\*</sup>

<sup>1</sup>Programa de Pós-Graduação em Engenharia Física, Unidade Acadêmica do Cabo de Santo Agostinho, Universidade Federal Rural de Pernambuco, Cabo de Santo Agostinho, Pernambuco 54518-430, Brazil

<sup>2</sup>Programa de Pós-Graduação em Ciência de Materiais, Universidade Federal de Pernambuco, Recife, Pernambuco 50740-560, Brazil

\*[areynao@yahoo.com.br](mailto:areynao@yahoo.com.br)

### 1. Thermal effects in Z-scan and D4 $\sigma$ through local and nonlocal nonlinearity models

Figure 1S shows the comparison between local and nonlocal models to fit the experimental Z-scan and D4 $\sigma$  curves obtained for ethanol by using a high-repetition-rate femtosecond Ti:sapphire laser. For demonstration purposes, the blue curves show curve fitting, using the numerical simulation described in main text, but considering the local model ( $m = 2.0$ ), as described by Sheik-Bahae *et al.* [1] and Amaral *et al.* [2]. Nonlinear refractive indices of  $-11.0 \times 10^{-9} \text{ cm}^2/\text{W}$  (Z-scan) and  $-4.9 \times 10^{-9} \text{ cm}^2/\text{W}$  (D4 $\sigma$ ) were obtained for this analysis. Although the value obtained by D4 $\sigma$  (Z-scan) is very close (of the same order of magnitude) to that recently reported in the literature ( $n_2 = -4.0 \times 10^{-9} \text{ cm}^2/\text{W}$ ) [3], the fit does not adequately describe the experimental results. On the contrary, considering that a quasi-continuous pulse excitation causes cumulative thermal effects, the experimental measurements were also fitted using the nonlocal model. The red lines show the best fits using  $m = 0.1$  and  $n_2 = -2.8 \times 10^{-8} \text{ cm}^2/\text{W}$  ( $n_2 = -2.2 \times 10^{-8} \text{ cm}^2/\text{W}$ ) for Z-scan (D4 $\sigma$ ) technique. Therefore, in this work the nonlocal model was used since it more adequately simulates the experimental results.

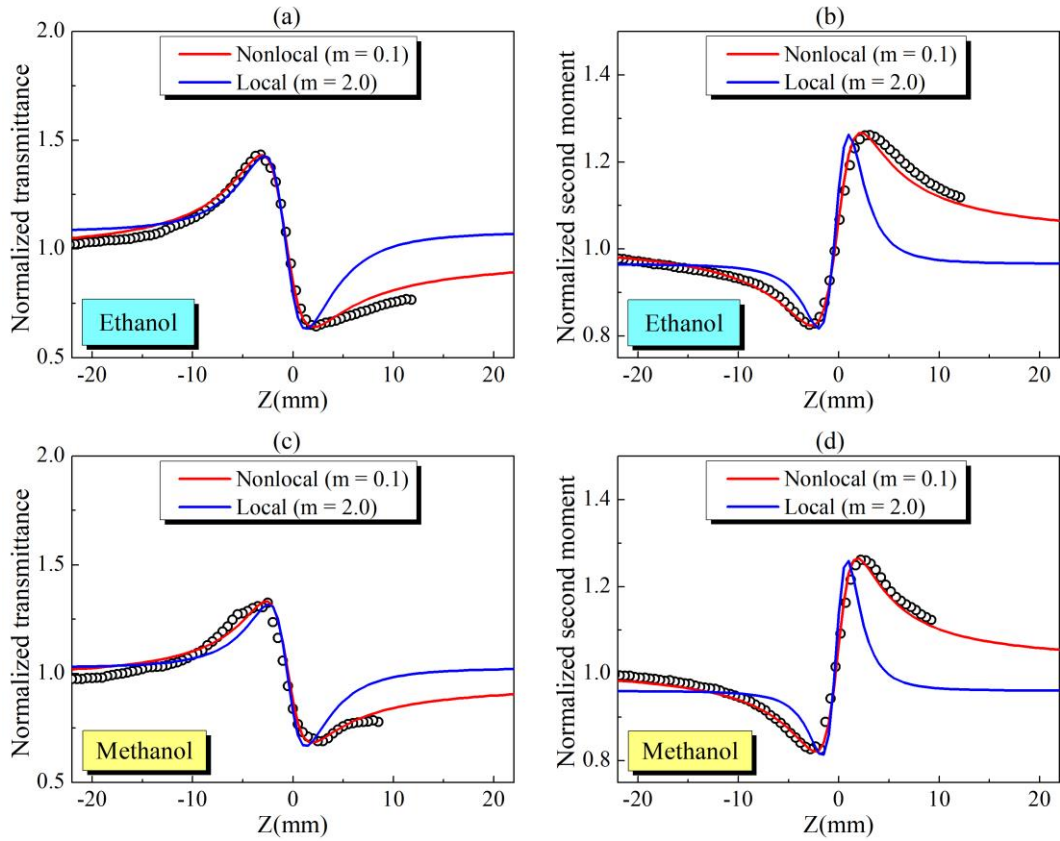

Fig. 1S: Experimental (a, c) Z-scan and (b, d)  $D4\sigma$  curves for (a, b) ethanol and (c, d) methanol, as well as their respective fits using the local (blue lines) and nonlocal (red lines) models.

A similar analysis was performed for methanol [see Fig. 1S(c) and Fig. 1S(d)], showing that the nonlocal model more adequately describes the experimental results under the conditions used in this work. Nonlinear refractive indices of  $-3.5 \times 10^{-8} \text{ cm}^2/\text{W}$  ( $-3.0 \times 10^{-8} \text{ cm}^2/\text{W}$ ) and  $-5.9 \times 10^{-9} \text{ cm}^2/\text{W}$  ( $-3.2 \times 10^{-8} \text{ cm}^2/\text{W}$ ) were obtained from the Z-scan and  $D4\sigma$  techniques, respectively, using the local (nonlocal) model.

## 2. IC-scan curves for methanol

Fig. 2S(a) shows the experimental IC-scan curves obtained for methanol by analyzing the maximum values of the self-correlation function at the different sample positions along the z-axis. For incident intensities used between 1.0 and 30  $\text{kW}/\text{cm}^2$ , Fig. 2S(b) shows the linear behavior of the peak-to-valley variation of the IC-scan curves,  $\Delta g_{self,max}^{(2)}$ .

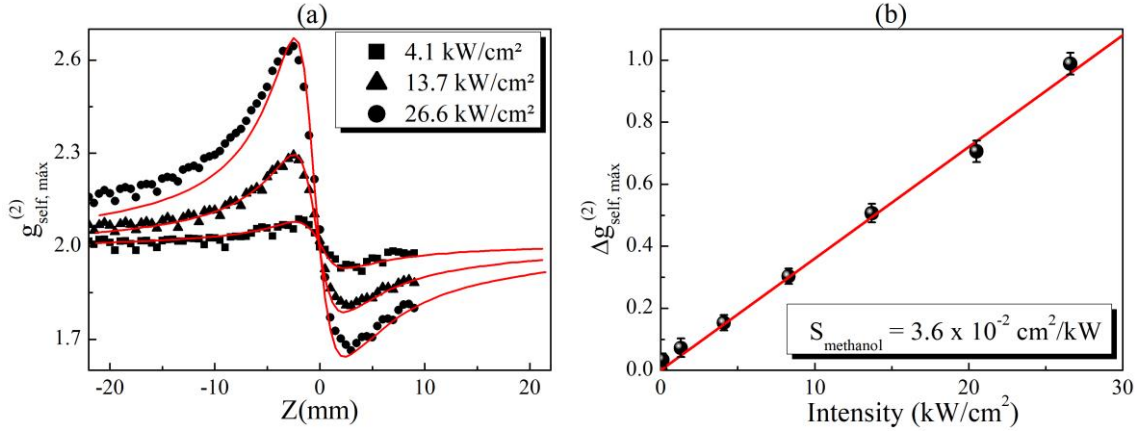

Fig. 2S: (a) Experimental and numerical (solid lines) IC-scan curves for methanol. (b) Peak-to-valley variation of IC-scan curves for methanol as a function of incident intensity.

The solid lines in Fig. 2S(a) represent the result of the simulation described in section 3 of the paper (main text), by using  $n_2^{methanol} = -(3.0 \pm 0.2) \times 10^{-8} \text{ cm}^2/\text{W}$ , a value close to that measured by the *external reference method*  $[-(3.1 \pm 0.3) \times 10^{-8} \text{ cm}^2/\text{W}]$ .

### 3. References

- [1] M. Sheik-Bahae, A. A. Said, T. H. Wei, D. J. Hagan, and E. W. Van Stryland, "Sensitive measurements of optical nonlinearities using a single beam," *IEEE J. Quantum Electron.* **QE-26**, 760-769 (1990).
- [2] A. M. Amaral, H. A. Mejía, E. L. Falcão-Filho, and C. B. de Araújo, "D4 $\sigma$  curves described analytically through propagation analysis of transverse irradiance moments," *Opt. Lett.* **41**, 2081-2084 (2016).
- [3] J. E. Q. Bautista, M. L. da Silva-Neto, C. L. A. V. Campos, M. Maldonado, C. B. de Araújo, and A. S. L. Gomes, "Thermal and non-thermal intensity dependent optical nonlinearities in ethanol at 800 nm, 1480 nm, and 1560 nm," *J. Opt. Soc. Am. B* **38**, 1104-1111 (2021).
